# Supplementary material for: Mitochondrial proteomic profiling reveals increased carbonic anhydrase II in aging and neurodegeneration
Source: PubMed Central journal article supplement (PMC5115898; doi:10.18632/aging.101064), 2016-10-10
Supplement: aging-08-2425-s001.pdf [file aging-08-2425-s001.pdf]

**SUPPLEMENTARY MATERIAL**

|           |     |             |             |            |             |            |
|-----------|-----|-------------|-------------|------------|-------------|------------|
| <b>A)</b> | 1   | MRATDRMGAR  | AVSELRLALL  | FVLVLGTPRL | GVQGEDGLDF  | PEYDGVORVI |
|           | 51  | NVNAKNYKNV  | FKKYEVLALL  | YHEPPEDDKA | SQRQFEMEEL  | ILELAAQVLE |
|           | 101 | DKGVGFGLVD  | SEKDAAVAKK  | LGLTEEDSVY | VFKGDEMEY   | DGEFSADTLV |
|           | 151 | EFLLDVLEDP  | VELIEGEREL  | QAFENIEDEI | KLIGYFKSKD  | SEHYKAYEDA |
|           | 201 | AEEFHPYIPF  | FATFDSKVAK  | KLTLKLEID  | FYEAFMEEPIM | TIPDKPNSEE |
|           | 251 | EIVSFVEEHR  | RSTLRKLPKPE | SMYETWEDDL | DGIHIVAFAE  | EADPDGYEFL |
|           | 301 | ETLKAVAQDN  | TENPOLSIMW  | IDPDDFPLL  | PYWEKTFDID  | LSAPQIGVWI |
|           | 351 | VTDADSIWME  | MDNEEDLPSA  | DELEDWLEDV | LEGEINTEDD  | DDDDDDDDDD |
|           | 401 | DDDDD       |             |            |             |            |
| <b>B)</b> | 1   | MAVPPTYADL  | GKSARDVFTK  | GYGFGLIKLD | LTKKSENGLE  | FTSSGSANTE |
|           | 51  | TTKVNGSLET  | KYRWTEYGLT  | FTEKWNTDNT | LGTEITVEDQ  | LARGKLTFD  |
|           | 101 | SSFSPNTGKK  | NAKIKTGYKR  | EHINLGCDDV | FDIAGPSIRG  | ALVLGYEGWL |
|           | 151 | AGYQMNIFETS | KSRVTQSNFA  | VGYKTDEFQL | HTMNDGTEF   | GGSIYQKVNK |
|           | 201 | KLETAVNLAW  | TAGNSNTRFG  | IAAKYQVDPD | ACFSAKVNNS  | SLIGLGYTQT |
|           | 251 | LKPGIKLTL   | ALLDGKNVNA  | GGHKLGLGLE | FOA         |            |
| <b>C)</b> | 1   | MAAPAASGLS  | RQVRSFSTSV  | VRPFAKLRVP | PVQVYGIEGR  | YATALYSAAS |
|           | 51  | KEKKLDQVEK  | ELLRVGQLLK  | DPKVSALVLN | PYIKRTVKVK  | SLNDITKREK |
|           | 101 | FSPLTANLJMN | LLAENGRIGN  | TQGIISAFST | IMSVHRGEVP  | CTVTTASPLD |
|           | 151 | DAVLSELKTV  | LKSFLSPNQI  | LKLEIKTDP  | IMGGMIVRIG  | EKYVDMSAKS |
|           | 201 | KIQKLSKAMR  | EML         |            |             |            |
| <b>D)</b> | 1   | MASKRALVIL  | AKGAEEMETV  | IPVDVMRRAG | IKVTVAGLAG  | KDPVQCSRDV |
|           | 51  | MICPDTSLED  | AKTQGPYDVV  | VLPGGNLGAQ | NLSESPMVKE  | ILKEQESRKG |
|           | 101 | LIAAICAGPT  | ALLAHEVGFG  | CKVTTHPLAK | DKMMNGSHYS  | YSESRVEKDG |
|           | 151 | LILTSRGPPT  | SFEFALAIVE  | ALVGKDMANQ | VKAPLVLKD   |            |
| <b>E)</b> | 1   | MAKEWGYASH  | NGPDHWHELY  | PIAKGDNOSP | IELHTKDIKH  | DPSLQPWSAS |
|           | 51  | YDPGSAKTIL  | NNGKTCRVVF  | DDTYDRSMLR | GGPLSGPYRL  | RQFHLHWGSS |
|           | 101 | DDHGSEHTVD  | GVKYAAELHL  | VHWNPKYNTF | GEALKQPDGI  | AVVGIFLKIG |
|           | 151 | REKGEFQILL  | DALDKIKTKG  | KEAPFTHFDP | SCLFPACRDY  | WTYHGSFTTP |
|           | 201 | PCEECIVWLL  | LKEPMTVSSD  | QMAKLRSLFS | SAENEPPVPL  | VGNWRPPQPW |
|           | 251 | KGRVVRASFK  |             |            |             |            |
| <b>F)</b> | 1   | MVLSADDKAN  | IKATWEKIGG  | HGAEYGAEL  | ERMFASFPTT  | KTYFPHFDVS |
|           | 51  | HGSAQVKSHG  | KKVADALANA  | AHLDLPGA   | LSALSOLHAH  | KLRVDPVNFK |
|           | 101 | LLGHCLLVTL  | ATHLQAGLTP  | AAHASLDFL  | ASVSTVLTSK  | YR         |

**Supplementary Figure 1.** (A) The peptides identified from spot 6 matched the peptide sequence of the protein calsequestrin. The peptides found in spot 6 are highlighted in red and cover 9.5% of the peptide sequence for calsequestrin. (B) The peptides in spot 26 matched the peptide sequence of voltage-dependent anion-selective channel protein 1 (VDAC 1). The peptides found in spot 26 are highlighted in red and covers 26% of VDAC 1 peptide sequence. (C) The peptides in spot 47 matched the peptide sequence of ATP synthase subunit O. The peptides found in spot 47 are highlighted in red and covers 44% of ATP synthase subunit O peptide sequence. (D) The peptides in spot 47 also matched the peptide sequence of protein DJ-1. The peptides found in spot 47 are highlighted in red and covers 24% of protein DJ-1 peptide sequence. (E) The peptides in spot 29 matched the peptide sequence of protein carbonic anhydrase III. The peptides found in spot 47 are highlighted in red and covers 19% of protein carbonic anhydrase III peptide sequence. (F) The peptides in spot 60 matched the peptide sequence of protein haemoglobin subunit alpha. The peptides found in spot 60 are highlighted in red and covers 21% of protein haemoglobin subunit alpha peptide sequence.

| A)  |                   |                   |            |            |             |
|-----|-------------------|-------------------|------------|------------|-------------|
| 1   | MSHHWGYSKH        | NGPENWHKDF        | PIANGDRQSP | VDIDTATAQH | DPALQPLLIS  |
| 51  | YDKAASKSIV        | NNGHSFNVEF        | DDSQDNAVLK | GGPLSDSYRL | IQFHFHWGSS  |
| 101 | DGQGSEHTVN        | KKKYAAELHL        | VHWNKYGDF  | GKAVQQPDGL | AVLIGIFLKIG |
| 151 | <b>PASQGLQKVL</b> | <b>EALHSIKTKG</b> | KRAAFANFDP | CSLLPGNLDY | WYFGSLTIP   |
| 201 | PLLECIVIV         | LREPITVSE         | QMSHFRTLNF | NEEGDAEEM  | VDNWRPAQPL  |
| 251 | KNRKIKASFK        |                   |            |            |             |

  

| B)  |                                                               |
|-----|---------------------------------------------------------------|
| 1   | mavvaglvrgplrqsagllkrrfhrsapaavqltvreainqgmdeelerdekvfllgeev  |
| 61  | aqydgaykvsrglwkkkygdkriidtpisemgfagiavgaamaglrpicefntfnfsmqai |
| 121 | dqvinsaaktyymsaglpvqvfrgpngasagvaqhsqcfaawyghcpglkwvwpms      |
| 181 | edakglikasairdnnpvmlenelmygvafelpaaqskdflipigkakierqgthitvv   |
| 241 | ahsrpvgchleaaaavlskegiecevinlxtirpmdieaieasvmktnhltvvegwpqfg  |
| 301 | vgaeicarimegpaafnldapavrvtgadvmpmyakvlednsvpqvkdiiifavkktlni  |

  

| C)  |            |                   |                   |                   |                   |
|-----|------------|-------------------|-------------------|-------------------|-------------------|
| 1   | MSILRIHARE | IFDSRGNPTV        | EVDLYTAKGL        | <b>FRAAVPSGAS</b> | <b>TGIYEALELR</b> |
| 51  | DNDKTRFMGK | <b>GVSQAVEHIN</b> | KTIAPALVSK        | <b>KVNWEQEKI</b>  | DKLMIEMDGT        |
| 101 | ENKSKFGANA | ILGVSLAVCK        | AGAVEKGVPL        | YRHIADLAGN        | PEVILPVPAF        |
| 151 | NVINGGSHAG | NKLAMQEFMI        | LPVGASSFRE        | AMRIGAEVYH        | NLKNVIKEY         |
| 201 | GKDATNVGDE | GGFAPNILEN        | KEALELLKTA        | IAKAGYTDQV        | VIGMDVAASE        |
| 251 | FYRSGKYDLD | FKSPDDPSRY        | <b>ITPDQLADLY</b> | <b>KSFVQNYFVW</b> | SIEDPFDQDD        |
| 301 | NGAWQKFTAS | AGIQVVGDDL        | TVINPKRIAK        | AASEKSCNCL        | LLKVNQIGSV        |
| 351 | TESLQACKLA | QSNWGVVMS         | HRSGETEDTF        | IADLVVGLCT        | GQIKTGAPCR        |
| 401 | SERLAKYNQI | <b>LRIEEELGSK</b> | AKFAGRSFRN        | PLAK              |                   |

  

| D)  |                   |            |                   |                   |                   |
|-----|-------------------|------------|-------------------|-------------------|-------------------|
| 1   | MFSLALRARA        | TGLAAQWGRH | ARNLHKTAVH        | NGAGGALFVH        | RDPENNPDT         |
| 51  | PFDFTPENYK        | RIEAIVKNYP | <b>EGHQAAAVLP</b> | <b>VLDLAQRQNG</b> | WLPISAMNKV        |
| 101 | AEVLQVPPMR        | VYEVATFYIM | YNRKFVGKYH        | IQVCITTPCM        | <b>LRDSDSILET</b> |
| 151 | <b>LQRKLGKIVG</b> | ETTPDKLFTL | IEVECLGACV        | NAPMVQINDN        | YYEDLTPKDI        |
| 201 | EEIIDELKAG        | KVPKPGPRSG | RFCCEPAGGL        | TSLTEPFKGP        | GFGVQAGL          |

**Supplementary Figure 2.** (A) The peptides in spot 133 matched the peptide sequence of carbonic anhydrase II. The peptides found in spot 133 are highlighted in red and covers 7% of carbonic anhydrase II peptide sequence. Carbonic anhydrase II was found to increase in abundance in the aged brain mitochondrial proteome. (B) In addition to using the MASCOT database peptide de novo sequencing was also used to identify protein spot 108. The peptides identified in protein spot 108 matched 14% of the sequence for the protein pyruvate dehydrogenase E1 subunit  $\beta$  (matching peptides are highlighted in blue, purple and green). (C) The peptides in spot 75 matched the peptide sequence of alpha enolase. The peptides found in spot 75 are highlighted in red and covers 13% of alpha enolase peptide sequence. Alpha enolase was found to increase in abundance in the aged mitochondrial proteome. (D) The peptides in spot 153 matched the peptide sequence of NADH dehydrogenase flavoprotein 2. The peptides found in spot 153 are highlighted in red and covers 12% of alpha enolase peptide sequence. NADH dehydrogenase flavoprotein 2 was found to increase in abundance in the aged mitochondrial proteome.
